# Supplementary material for: The evolving volcano-ice interactions of Crater Glacier, Mount St. Helens, Washington (USA)
Source: Springer Nature journal article supplement (doi:10.1007/s00445-023-01632-5), 2023-03-10
Supplement: MOESM4 [file 445_2023_1632_MOESM4_ESM.docx]

**Supplementary Table S1:** Google Earth image dates and image sources.

| **Image Date** | **Source** |
| --- | --- |
|  | |
| **Figure 2** | |
| 7/26/21 | Google Earth |
|  |  |
| **Figure 3** | |
| 6/24/2006 | Google Earth / USDA/FPAC/GEO |
| 6/26/2009 | Google Earth / USDA/FPAC/GEO |
| 9/26/2011 | Google Earth / USDA/FPAC/GEO |
| 8/15/2012 | Google Earth |
| 7/16/2014 | Google Earth |
| 7/26/2018 | Google Earth |
| 7/26/2021 | Google Earth |
|  |  |
| **Figure 4** | |
| 10/3/2004 | Google Earth / 2021 Maxar Technologies |
| 6/24/2006 | Google Earth / USDA Farm Service Agency |
| 6/26/2009 | Google Earth / USDA Farm Service Agency |
| 9/26/2011 | Google Earth / USDA Farm Service Agency |
| 8/15/2012 | Google Earth |
| 7/16/2014 | Google Earth |
| 5/13/2016 | Google Earth |
| 7/18/2017 | Google Earth |
| 7/26/2018 | Google Earth |
| 7/26/2021 | Google Earth |
|  |  |
| **Figure 5** | |
| 8/15/2012 | Google Earth |
| 7/16/2014 | Google Earth |
| 5/13/2016 | Google Earth |
| 7/18/2017 | Google Earth |
| 7/26/2018 | Google Earth |
| 7/26/2021 | Google Earth |
|  |  |
| **Supplementary Figure S3** |  |
| 7/26/2021 | Google Earth |
