# Supplementary material for: The evolving volcano-ice interactions of Crater Glacier, Mount St. Helens, Washington (USA)
Source: Springer Nature journal article supplement (doi:10.1007/s00445-023-01632-5), 2023-03-10
Supplement: MOESM5 [file 445_2023_1632_MOESM5_ESM.xlsx]

## Sheet: Glass EMPA
Legend
	type 1a glasses
	type 1b glasses
	type 1c glasses
	type 2 glasses
Sample A		Na2O	CaO	SiO2	FeO	MgO	K2O	Al2O3	MnO	P2O5	TiO2	Total
LS1_Ab_0		4.4953	4.50541	60.4593	8.90979	2.44464	2.60627	13.3243	0.167791	0.672881	2.41433	100
LS1_Ab_1		4.55415	2.45343	72.913	2.2667	0.591365	2.10072	14.5805	0.0765594	0.0867259	0.376728	99.9999
LS1_Ab_2		3.78642	1.31386	77.0349	1.57535	0.228233	2.49052	13.242	0.0542465	0.0358034	0.238608	99.9999
LS1_Ab_4		5.59254	1.45628	76.4549	0.762628	0.0158775	1.83047	13.6527	0.0081916	0.0344856	0.191845	99.9999
LS1_Ab_6		4.92832	1.43035	75.0052	1.39927	0.240963	2.89115	13.5915	0.0385829	0.0546334	0.419988	99.9999
LS1_Ab_8		4.36392	0.956778	76.137	1.58619	0.0345448	3.57897	12.6837	0.0473046	0.06207	0.549467	99.9999
LS1_Ab_15		4.32169	1.44247	76.4484	1.37984	0.271757	2.50149	13.3057	0.0480684	0.0298664	0.25063	99.9999
LS1_Ab_16		5.45622	1.68889	73.0378	1.92055	0.0597389	3.07495	14.1065	0.00502138	0.0884177	0.561929	99.9999
LS1_Ab_17		4.00026	0.369375	76.4933	2.20274	0.214663	4.24963	11.128	0.0503929	0.140269	1.15124	99.9999
LS1_Ab_18		4.40373	5.83233	58.8624	9.37014	3.01556	1.41512	14.751	0.184808	0.264561	1.90031	99.9999
LS1_Ab_20		4.33646	5.30518	58.9899	9.22898	3.33628	1.35361	15.1182	0.146181	0.322367	1.86276	99.9999
LS1_Ab_21		2.29486	8.24801	53.467	9.78355	5.44693	1.45116	16.442	0.190238	0.428566	2.24762	99.9999
LS1_Ab_23		4.27598	8.41675	52.4441	10.1001	4.69174	1.65631	14.9473	0.188954	0.523799	2.75488	99.9999
LS1_Ab_24		3.6883	0.656638	79.2228	1.33041	0.0731613	3.04335	11.6494	0.0536113	0.0214647	0.260801	99.9999
LS1_Ab_25		4.28753	4.88273	60.9321	10.4783	1.82021	2.02092	12.6757	0.124093	0.387158	2.39119	99.9999
LS1_Ab_27		4.90585	2.43603	72.6248	2.2198	0.473962	2.0441	14.8122	0.0541265	0.0689927	0.360066	99.9999
LS1_Ab_28		3.70175	8.719	51.7072	9.68778	5.06824	2.03953	15.3883	0.209052	0.649183	2.82985	99.9999
LS1_Ab_30		3.92342	1.05189	74.8274	2.60515	0.31628	4.63487	11.8226	0.0105671	0.075225	0.732476	99.9999
LS1_Ab_33		4.48858	1.43086	76.1942	1.37902	0.236971	2.49817	13.4404	0.0298054	0.0143188	0.287594	99.9999
LS1_Ab_34		4.15986	8.71444	51.6642	9.74682	4.70135	1.64471	15.9259	0.134208	0.631418	2.67708	99.9999
LS1_Ab_36		4.58797	2.38162	73.0982	2.43317	0.603653	2.12387	14.1866	0.0325797	0.125989	0.426217	99.9999
LS1_Ab_37		4.61254	1.66092	74.9623	1.6847	0.273492	2.28589	14.2656	0.0246591	0.0123975	0.217381	99.9999
LS1_Ab_38		4.60754	2.28081	73.5932	2.08181	0.390442	2.03079	14.5778	0.0345949	0.0347479	0.368195	99.9999
LS1_Ab_39		4.76606	2.23568	73.4826	2.00872	0.366956	2.00872	14.5895	0.0361773	0.0791633	0.426337	99.9999
LS1_Ab_41		3.82054	8.19507	53.6362	9.5902	4.44547	1.32418	15.897	0.176333	0.479442	2.43555	99.9999
LS1_Ab_42		4.39029	5.54955	58.7874	9.50724	2.58889	1.52089	15.0162	0.191395	0.33909	2.10896	99.9999
LS1_Ab_43		4.44679	1.61057	75.3017	1.49915	0.317353	2.42092	14.0798	0.0568257	0.062802	0.204005	99.9999
Sample B
LS2_Ba_2		3.77942	1.48253	74.1581	3.95691	0.197323	3.41401	11.5784	0.0946943	0.30298	1.03569	100
LS2_Ba_3		5.13042	2.4997	66.6619	5.18418	1.09832	3.4102	13.8592	0.0996183	0.392526	1.66388	100
LS2_Ba_5		4.379	9.06257	51.1064	9.80368	4.79863	1.80033	15.4788	0.18582	0.599659	2.7851	100
LS2_Ba_6		5.12574	2.29587	73.8725	1.3713	0.100202	2.42512	14.3636	0.0124827	0.0372441	0.395808	99.9999
LS2_Ba_7		4.10537	2.15853	70.6589	4.44199	2.99675	1.78721	13.326	0.104074	0.0789495	0.342172	99.9999
LS2_Ba_10		5.31067	1.98744	73.7308	1.58608	0.0603707	2.72137	14.1769	0.0300289	0.0306545	0.365665	99.9999
LS2_Ba_11		2.7557	9.19469	52.0028	9.9327	4.97651	1.79087	15.8131	0.208776	0.572501	2.75231	100
LS2_Ba_15		5.37485	6.77757	51.6343	10.9655	3.89457	3.86085	13.5046	0.202821	0.605227	3.17973	100
LS2_Ba_17		5.02138	2.97208	73.0374	1.36663	0.16099	1.80437	15.2236	0.0486192	0.0255819	0.339283	99.9999
LS2_Ba_19		4.41355	2.01907	72.2807	1.83644	0.487012	4.10916	14.2755	0.0683846	0.109375	0.400669	99.9999
LS2_Ba_23		4.65095	1.67846	75.1875	1.75741	0.312386	2.29973	13.8259	0.0360406	0.0559487	0.19558	99.9999
LS2_Ba_24		4.40255	1.41084	76.1749	1.63832	0.268022	2.55857	13.1972	0.05518	0.0345093	0.259865	99.9999
LS2_Ba_26		4.5895	2.49586	69.3788	5.70336	0.751441	2.76401	12.8094	0.105507	0.277123	1.125	100
LS2_Ba_28		6.22736	2.4119	68.1158	5.05181	0.949507	2.10281	13.306	0.101948	0.321907	1.41086	99.9999
LS2_Ba_30		4.78574	5.79144	57.8693	8.83974	3.05871	2.68417	14.6312	0.118672	0.334412	1.88655	99.9999
LS2_Ba_34		4.23771	4.76953	61.3038	9.64004	2.08351	1.87819	13.4671	0.164527	0.348442	2.10708	99.9999
LS2_Ba_38		4.20087	8.53334	52.1752	10.0618	4.56528	1.66685	15.3121	0.162974	0.544561	2.77696	99.9999
LS2_Ba_39		4.39051	0.808216	77.0504	1.80756	0.132269	3.21736	12.0437	0.0337344	0.0585066	0.45763	99.9999
LS2_Ba_41		4.76888	1.76926	74.5429	2.11498	0.389035	2.27767	13.5949	0.0269457	0.0841925	0.431131	99.9999
LS2_Ba_42		4.04368	1.69258	75.41	1.7286	0.323597	2.28422	14.2146	0.0296845	0.0377616	0.23511	99.9999
LS2_Ba_43		2.66437	1.46179	77.6095	1.71388	0.224546	2.58107	13.3901	0.0149538	0.038716	0.300886	99.9999
LS2_Ba_44		4.52059	1.49154	75.9867	1.37916	0.267557	2.56422	13.4749	0.019155	0.051693	0.244367	99.9999
LS2_Ba_45		4.81396	2.52224	72.1077	2.2985	0.631849	1.94931	15.1504	0.0312907	0.108111	0.386608	100
LS2_Ba_46		4.77094	2.57916	71.7884	2.46363	0.620936	1.98449	15.2473	0.055593	0.0875012	0.401996	99.9999
LS2_Ba_47		4.72572	2.63252	71.8701	2.51454	0.853225	2.00894	14.8243	0.0736161	0.0893573	0.407585	99.9999
LS2_Ba_48		3.70747	4.97484	61.0465	9.63875	2.30154	2.10214	13.5253	0.131536	0.354795	2.21705	100
LS2_Ba_49		4.38284	1.49832	76.0169	1.56967	0.271125	2.60932	13.3422	0.00988688	0.038834	0.260932	100
LS2_Ba_50		4.28848	1.39649	76.0614	1.56006	0.269668	2.53594	13.5746	0.0260685	0.0123252	0.274902	99.9999
LS2_Ba_51		4.5971	1.68832	75.0385	1.68154	0.250027	2.3867	14.0862	0.0472593	0.038377	0.185884	100
LS2_Ba_52		4.17331	1.46876	76.1831	1.47889	0.287371	2.58299	13.5531	0.0130669	0.011041	0.248271	99.9999
LS2_Bb_1		4.21695	5.69641	59.4399	9.74226	2.7375	1.52978	14.0196	0.120872	0.322763	2.17389	99.9999
LS2_Bb_2		4.83667	2.58023	72.8233	1.89217	0.408082	1.93265	15.0362	0.0779129	0.0498339	0.362902	99.9999
Sample C
LS2_Ca_2		4.59909	2.67272	65.8799	6.4246	1.27483	3.86283	12.9299	0.104286	0.446394	1.80534	99.9999
LS2_Ca_14		4.63638	1.86474	69.4641	4.21859	0.794502	4.33068	13.0736	0.0456505	0.259128	1.31255	99.9999
LS2_Ca_16		4.22179	0.674269	74.1859	3.05471	0.315823	4.08986	12.0869	0.0449581	0.13599	1.18971	99.9999
LS2_Ca_21		3.68776	0.0598044	77.7944	1.00213	0.0104371	5.31595	11.3347	0.0163514	0.0763993	0.702067	100
LS2_Ca_22		4.58166	1.66793	69.6207	4.81847	0.868045	4.06687	12.8081	0.13364	0.222906	1.21162	99.9999
LS2_Ca_23		5.28257	3.74454	64.5167	4.79	1.03023	3.11626	15.7371	0.0720761	0.379078	1.3314	99.9999
LS2_Cb_2		5.2402	3.45955	68.6823	2.70659	0.310444	2.56414	16.2497	0	0.0682753	0.718671	99.9999
Sample D
LS3_Db_5		5.37927	1.24631	71.0721	3.50262	0.481052	4.1564	12.5911	0.0852282	0.197996	1.28784	99.9999
LS3_Db_7		4.76608	2.60952	71.8935	2.55205	0.586059	1.90305	15.1298	0.0566184	0.0966399	0.406638	99.9999
LS3_Db_8		4.55039	1.73976	69.918	4.61796	0.717895	4.1315	12.8539	0.0745224	0.188502	1.20749	99.9999
LS3_Db_10		5.02226	2.41189	70.2443	4.50758	0.613839	2.14278	13.6136	0.0922373	0.238868	1.1126	99.9999

## Sheet: Photos
Sample A
LS1_Ab_1
LS1_Ab_2
LS1_Ab_4
LS1_Ab_6
LS1_Ab_8
LS1_Ab_15
LS1_Ab_16
LS1_Ab_17
LS1_Ab_18
LS1_Ab_20
LS1_Ab_21
LS1_Ab_23
LS1_Ab_24
LS1_Ab_25
LS1_Ab_27
LS1_Ab_28
LS1_Ab_30
LS1_Ab_33
LS1_Ab_34
LS1_Ab_36
LS1_Ab_37
LS1_Ab_38
LS1_Ab_39
LS1_Ab_41
LS1_Ab_42
LS1_Ab_43
Sample B
LS2_Ba_2
LS2_Ba_3
LS2_Ba_5
LS2_Ba_6
LS2_Ba_7
LS2_Ba_10
LS2_Ba_11
LS2_Ba_15
LS2_Ba_17
LS2_Ba_19
LS2_Ba_23
LS2_Ba_24
LS2_Ba_26
LS2_Ba_28
LS2_Ba_30
LS2_Ba_34
LS2_Ba_38
LS2_Ba_39
LS2_Ba_41
LS2_Ba_42
LS2_Ba_43
LS2_Ba_44
LS2_Ba_45
LS2_Ba_46
LS2_Ba_47
LS2_Ba_48
LS2_Ba_49
LS2_Ba_50
LS2_Ba_51
LS2_Ba_52
LS2_Bb_1
LS2_Bb_2
Sample C
LS2_Ca_2
LS2_Ca_14
LS2_Ca_16
LS2_Ca_21
LS2_Ca_22
LS2_Ca_23
LS2_Cb_2
Sample D
LS3_Db_5
LS3_Db_7
LS3_Db_8
LS3_Db_10
